# Supplementary material
Source: PubMed Central journal article supplement (PMC2826169)
Supplement: NIHMS172687-supplement-Data_Supplement.pdf [file NIHMS172687-supplement-Data_Supplement.pdf]

**Supplemental Table 1.** Proteins identified in immunoprecipitated brain Kv4.2 channel complexes using in-gel 1D-LC-MS/MS experiments.

| Protein          | Molecular weight | Mascot protein score | Scaffold protein probability | Unique peptides | Total peptides | % AA sequence coverage | Peptide sequence         | Mascot ion score | m/z (observed) | Charge | Mass (observed) | Mass (theoretical) | Mass error (ppm) | Modifications            |
|------------------|------------------|----------------------|------------------------------|-----------------|----------------|------------------------|--------------------------|------------------|----------------|--------|-----------------|--------------------|------------------|--------------------------|
| Kv4.2            | 71               | 275                  | 100%                         | 7               | 7              |                        | 14 IPNANVSGSHR           | 97               | 576.300        | 2      | 1150.585        | 1150.584           | 0.9              |                          |
|                  |                  |                      |                              |                 |                |                        | GSVQELSTIQIR             | 82               | 665.876        | 2      | 1329.738        | 1329.725           | 9.6              |                          |
|                  |                  |                      |                              |                 |                |                        | YPTLLGSSER               | 66               | 619.310        | 2      | 1236.606        | 1236.599           | 5.6              |                          |
|                  |                  |                      |                              |                 |                |                        | NGLLSNLQSSSEDEPAFISK     | 60               | 1089.041       | 2      | 2176.067        | 2176.065           | 1.1              |                          |
|                  |                  |                      |                              |                 |                |                        | LQDDADTDNTGESALPTMTAR    | 51               | 1119.500       | 2      | 2236.985        | 2236.975           | 4.4              | Oxidation (M)            |
|                  |                  |                      |                              |                 |                |                        | ILGYTLK                  | 35               | 404.250        | 2      | 806.485         | 806.490            | 5.8              |                          |
|                  |                  |                      |                              |                 |                |                        | DPDIFR                   | 32               | 381.690        | 2      | 761.365         | 761.371            | 7                |                          |
| Kv4.1            | 73               | 184                  | 100%                         | 4               | 4              |                        | 6 LANSTASVSR             | 85               | 503.270        | 2      | 1004.525        | 1004.525           | 0.3              |                          |
|                  |                  |                      |                              |                 |                |                        | NDDVSGAFVTLR             | 69               | 647.330        | 2      | 1292.645        | 1292.636           | 7.2              |                          |
|                  |                  |                      |                              |                 |                |                        | GDEVLVNVVSGR             | 59               | 622.340        | 2      | 1242.665        | 1242.657           | 6.9              |                          |
|                  |                  |                      |                              |                 |                |                        | LFAAPSR                  | 46               | 381.220        | 2      | 760.425         | 760.423            | 3                |                          |
| Kv4.3            | 74               | 121                  | 100%                         | 4               | 4              |                        | 12 NGLLNEALELTGTPEEEQMGK | 44               | 1145.050       | 2      | 2288.085        | 2288.084           | 0.5              | Oxidation (M)            |
|                  |                  |                      |                              |                 |                |                        | TTHLPNSLTPATR            | 40               | 474.590        | 3      | 1420.748        | 1420.742           | 4.1              |                          |
|                  |                  |                      |                              |                 |                |                        | SMQELSTLHIQGSSEQPSLTTSR  | 37               | 816.070        | 3      | 2445.188        | 2445.181           | 3.1              | Oxidation (M)            |
|                  |                  |                      |                              |                 |                |                        | LMDDNDSENQESMPSLSFRR     | 37               | 1180.995       | 2      | 2359.975        | 2359.953           | 9.4              | 2 Oxidation (M)          |
| KChIP1           | 27               | 181                  | 100%                         | 3               | 3              |                        | 14 FEDFVTALSILLR         | 118              | 762.430        | 2      | 1522.845        | 1522.840           | 3.8              |                          |
|                  |                  |                      |                              |                 |                |                        | SLQLFONVM                | 73               | 548.280        | 2      | 1094.545        | 1094.543           | 2.2              | Oxidation (M)            |
|                  |                  |                      |                              |                 |                |                        | AIYDMMGK                 | 34               | 480.710        | 2      | 959.405         | 959.409            | 3.9              | 2 Oxidation (M)          |
| KChIP2           | 29               | 170                  | 100%                         | 5               | 6              |                        | 18 DLGGSYDQLTGHPGPGSKK   | 63               | 671.330        | 3      | 2010.968        | 2010.965           | 1.7              |                          |
|                  |                  |                      |                              |                 |                |                        | KESLSESR                 | 59               | 468.240        | 2      | 934.465         | 934.472            | 6.9              |                          |
|                  |                  |                      |                              |                 |                |                        | DLGGSYDQLTGHPGPGPSK      | 54               | 628.630        | 3      | 1882.868        | 1882.870           | 0.8              |                          |
|                  |                  |                      |                              |                 |                |                        | SMQLFDNVI                | 46               | 541.760        | 2      | 1081.505        | 1081.511           | 5.5              | Oxidation (M)            |
|                  |                  |                      |                              |                 |                |                        | EHVESFFQK                | 35               | 575.780        | 2      | 1149.545        | 1149.545           | 0                |                          |
| EHVESFFQK        | 33               | 384.190              | 3                            | 1149.548        | 1149.545       | 2.3                    |                          |                  |                |        |                 |                    |                  |                          |
| KChIP3           | 30               | 167                  | 100%                         | 5               | 5              |                        | 19 ASDGNLLGDPGR          | 88               | 586.290        | 2      | 1170.565        | 1170.563           | 2.1              |                          |
|                  |                  |                      |                              |                 |                |                        | HQPEGLDLOAQTK            | 67               | 531.610        | 3      | 1591.808        | 1591.795           | 8                |                          |
|                  |                  |                      |                              |                 |                |                        | FFQKMDR                  | 38               | 494.240        | 2      | 986.465         | 986.464            | 1                | Oxidation (M)            |
|                  |                  |                      |                              |                 |                |                        | HTYPIILR                 | 36               | 450.260        | 2      | 898.505         | 898.502            | 3.3              |                          |
|                  |                  |                      |                              |                 |                |                        | SIYDMMGR                 | 34               | 502.710        | 2      | 1003.405        | 1003.410           | 4.8              | 2 Oxidation (M)          |
| KChIP4           | 29               | 388                  | 100%                         | 9               | 11             |                        | 38 HRPEALLELEAQS         | 99               | 810.940        | 2      | 1619.865        | 1619.863           | 1.4              |                          |
|                  |                  |                      |                              |                 |                |                        | TSSPAIQNSVEDELEMATVR     | 91               | 1097.020       | 2      | 2192.025        | 2192.027           | 0.5              | Oxidation (M)            |
|                  |                  |                      |                              |                 |                |                        | HRPEALLELEAQS            | 81               | 540.960        | 3      | 1619.858        | 1619.863           | 3                |                          |
|                  |                  |                      |                              |                 |                |                        | KELQILYR                 | 59               | 531.820        | 2      | 1061.625        | 1061.623           | 2                |                          |
|                  |                  |                      |                              |                 |                |                        | TSSPAIQNSVEDELEMATVR     | 48               | 731.680        | 3      | 2192.018        | 2192.027           | 3.8              | Oxidation (M)            |
|                  |                  |                      |                              |                 |                |                        | DGYITKEEMLDIMK           | 48               | 573.270        | 3      | 1716.788        | 1716.795           | 3.9              | 2 Oxidation (M)          |
|                  |                  |                      |                              |                 |                |                        | QHVETFFQK                | 45               | 573.780        | 2      | 1145.545        | 1145.551           | 4.4              | Gln->pyro-Glu (N-term Q) |
|                  |                  |                      |                              |                 |                |                        | GLSILLR                  | 43               | 386.260        | 2      | 770.505         | 770.501            | 5.2              |                          |
|                  |                  |                      |                              |                 |                |                        | SMQLFENVI                | 42               | 548.770        | 2      | 1095.525        | 1095.527           | 1.4              | Oxidation (M)            |
|                  |                  |                      |                              |                 |                |                        | AIYDMMGK                 | 39               | 480.710        | 2      | 959.405         | 959.409            | 3.9              | 2 Oxidation (M)          |
|                  |                  |                      |                              |                 |                |                        | DENIMR                   | 36               | 397.180        | 2      | 792.345         | 792.344            | 2.3              | Oxidation (M)            |
| DPP6             | 92               | 861                  | 100%                         | 23              | 28             |                        | 23 VTVEDLFSDFK           | 103              | 714.850        | 2      | 1427.686        | 1427.682           | 2.9              |                          |
|                  |                  |                      |                              |                 |                |                        | HLYSANTVDDFNR            | 98               | 776.370        | 2      | 1550.725        | 1550.711           | 9                |                          |
|                  |                  |                      |                              |                 |                |                        | MFDLEANEEVQK             | 80               | 734.840        | 2      | 1467.665        | 1467.655           | 7                | Oxidation (M)            |
|                  |                  |                      |                              |                 |                |                        | IYFLSTEDLPR              | 71               | 677.360        | 2      | 1352.705        | 1352.698           | 5.8              |                          |
|                  |                  |                      |                              |                 |                |                        | KVTVEDLFSDFK             | 69               | 778.900        | 2      | 1555.785        | 1555.777           | 5.4              |                          |
|                  |                  |                      |                              |                 |                |                        | LGFLEEKDQMEAVR           | 68               | 840.920        | 2      | 1679.825        | 1679.819           | 3.9              | Oxidation (M)            |
|                  |                  |                      |                              |                 |                |                        | MQGNVMELVGSNPPQR         | 65               | 894.927        | 2      | 1787.840        | 1787.829           | 5.9              | 2 Oxidation (M)          |
|                  |                  |                      |                              |                 |                |                        | LYASAFSER                | 63               | 522.260        | 2      | 1042.505        | 1042.508           | 2.7              |                          |
|                  |                  |                      |                              |                 |                |                        | VAVTWLNR                 | 60               | 479.780        | 2      | 957.545         | 957.540            | 6.1              |                          |
|                  |                  |                      |                              |                 |                |                        | IPHGDPQSLDPPEVSNK        | 59               | 634.320        | 3      | 1899.938        | 1899.933           | 2.9              |                          |
|                  |                  |                      |                              |                 |                |                        | ILSYDEKR                 | 59               | 512.280        | 2      | 1022.545        | 1022.540           | 5.6              |                          |
|                  |                  |                      |                              |                 |                |                        | RLGFLEEKDQMEAVR          | 57               | 612.980        | 3      | 1835.918        | 1835.920           | 0.9              | Oxidation (M)            |
|                  |                  |                      |                              |                 |                |                        | LPTATAKEEEEEED           | 55               | 731.340        | 2      | 1460.665        | 1460.652           | 9.3              |                          |
|                  |                  |                      |                              |                 |                |                        | IHFQHTAELITQLIK          | 55               | 598.010        | 3      | 1791.008        | 1791.004           | 2.1              |                          |
|                  |                  |                      |                              |                 |                |                        | QNKEEYVFSK               | 50               | 530.750        | 2      | 1059.485        | 1059.487           | 1.7              | Gln->pyro-Glu (N-term Q) |
|                  |                  |                      |                              |                 |                |                        | EYITMVK                  | 47               | 531.760        | 2      | 1061.505        | 1061.510           | 4.5              | Oxidation (M)            |
| MQGNVMELVGSNPPQR | 46               | 596.950              | 3                            | 1787.828        | 1787.829       | 0.7                    | 2 Oxidation (M)          |                  |                |        |                 |                    |                  |                          |
| LLQEVRR          | 46               | 379.230              | 2                            | 756.445         | 756.449        | 5.1                    |                          |                  |                |        |                 |                    |                  |                          |

|       |    |     |      |    |    |                    |    |         |   |          |          |                   |
|-------|----|-----|------|----|----|--------------------|----|---------|---|----------|----------|-------------------|
|       |    |     |      |    |    | IPHGDPQSLDPPEVSNK  | 46 | 950.980 | 2 | 1899.945 | 1899.933 | 6.7               |
|       |    |     |      |    |    | HLYSANTVDDFNR      | 45 | 517.910 | 3 | 1550.708 | 1550.711 | 2                 |
|       |    |     |      |    |    | VQDKLPTATAK        | 44 | 586.340 | 2 | 1170.665 | 1170.661 | 3.9               |
|       |    |     |      |    |    | LGFLLEEKDQMEAVR    | 44 | 560.950 | 3 | 1679.828 | 1679.819 | 5.5 Oxidation (M) |
|       |    |     |      |    |    | YEISPK             | 41 | 426.210 | 2 | 850.405  | 850.407  | 2                 |
|       |    |     |      |    |    | LGFLLEEK           | 41 | 418.230 | 2 | 834.445  | 834.449  | 3.8               |
|       |    |     |      |    |    | YLGHLGLDNR         | 40 | 579.310 | 2 | 1156.605 | 1156.599 | 5.4               |
|       |    |     |      |    |    | VQDKLPTATAK        | 36 | 391.230 | 3 | 1170.668 | 1170.661 | 6.2               |
|       |    |     |      |    |    | LPTATAK            | 34 | 351.210 | 2 | 700.405  | 700.412  | 9.2               |
|       |    |     |      |    |    | EQYDKTR            | 31 | 526.770 | 2 | 1051.525 | 1051.530 | 4.1               |
| DPP10 | 91 | 526 | 100% | 15 | 16 | 21 VPVVSLLHITDNPSR | 83 | 767.430 | 2 | 1532.845 | 1532.831 | 9.3               |
|       |    |     |      |    |    | YFLENNVSMK         | 80 | 687.340 | 2 | 1372.665 | 1372.670 | 3 Oxidation (M)   |
|       |    |     |      |    |    | QLYSASTEGLLNR      | 74 | 726.380 | 2 | 1450.745 | 1450.742 | 2.6               |
|       |    |     |      |    |    | IYFLSTESSPQGR      | 60 | 742.873 | 2 | 1483.731 | 1483.731 | 0.1               |
|       |    |     |      |    |    | GFGLHNPEPR         | 58 | 562.290 | 2 | 1122.565 | 1122.557 | 7.4               |
|       |    |     |      |    |    | VPVVSLLHITDNPSR    | 55 | 511.950 | 3 | 1532.828 | 1532.831 | 1.9               |
|       |    |     |      |    |    | SEQITVR            | 55 | 416.730 | 2 | 831.445  | 831.445  | 0.5               |
|       |    |     |      |    |    | ILAYDETTQK         | 54 | 591.310 | 2 | 1180.605 | 1180.598 | 6.6               |
|       |    |     |      |    |    | ATQSQPADQELGNSPPQR | 51 | 670.990 | 3 | 2009.948 | 2009.940 | 3.9               |
|       |    |     |      |    |    | GEFHIAFLVQSK       | 49 | 553.950 | 3 | 1658.828 | 1658.824 | 2.5 Oxidation (M) |
|       |    |     |      |    |    | QNEEPVFSR          | 48 | 553.270 | 2 | 1104.525 | 1104.520 | 4.9               |
|       |    |     |      |    |    | VHFQHSALIK         | 42 | 436.910 | 3 | 1307.708 | 1307.699 | 7.3               |
|       |    |     |      |    |    | VLQEIHR            | 40 | 447.760 | 2 | 893.505  | 893.508  | 3.1               |
|       |    |     |      |    |    | QEQQPTPGAR         | 40 | 556.280 | 2 | 1110.545 | 1110.542 | 3.3               |
|       |    |     |      |    |    | EEVSVLPQEPPEDE     | 39 | 814.860 | 2 | 1627.705 | 1627.710 | 2.8               |
|       |    |     |      |    |    | QPYIDSK            | 38 | 425.720 | 2 | 849.425  | 849.423  | 2.6               |

**Supplemental Table 2.** Proteins identified in immunoprecipitated brain Kv4.2 channel complexes using in-solution 1D-LC-MS/MS experiments.

| Protein     | Molecular weight | Mascot protein score | Scaffold protein probability | Unique peptides | Total peptides | % AA sequence coverage | Peptide sequence              | Mascot ion score | m/z (observed) | Charge | Mass (observed) | Mass (theoretical) | Mass error (ppm) | Modifications             |     |          |   |          |          |     |  |
|-------------|------------------|----------------------|------------------------------|-----------------|----------------|------------------------|-------------------------------|------------------|----------------|--------|-----------------|--------------------|------------------|---------------------------|-----|----------|---|----------|----------|-----|--|
| Kv4.2       | 71               | 730                  | 100%                         | 12              | 16             |                        | 22 ENAERLQDDADTDNTGESALPTMTAR | 96               | 941.087        | 3      | 2820.239        | 2820.247           | 2.7              |                           |     |          |   |          |          |     |  |
|             |                  |                      |                              |                 |                |                        | AAAIGWMPVASGMPAPPRQER         | 92               | 764.056        | 3      | 2289.146        | 2289.151           | 2                |                           |     |          |   |          |          |     |  |
|             |                  |                      |                              |                 |                |                        | LQDDADTDNTGESALPTMTAR         | 84               | 1111.494       | 2      | 2220.973        | 2220.980           | 3.2              |                           |     |          |   |          |          |     |  |
|             |                  |                      |                              |                 |                |                        | TQDALIVLNVSGTR                | 81               | 743.913        | 2      | 1485.812        | 1485.815           | 2.1              |                           |     |          |   |          |          |     |  |
|             |                  |                      |                              |                 |                |                        | AAAIGWMPVASGMPAPPRQER         | 78               | 769.388        | 3      | 2305.141        | 2305.146           | 2.1              | Oxidation (M)             |     |          |   |          |          |     |  |
|             |                  |                      |                              |                 |                |                        | RNGLLSNQLQSSEDEPAFISK         | 76               | 778.394        | 3      | 2332.161        | 2332.166           | 1.8              |                           |     |          |   |          |          |     |  |
|             |                  |                      |                              |                 |                |                        | SGSANAYMQSK                   | 73               | 572.257        | 2      | 1142.499        | 1142.503           | 2.8              |                           |     |          |   |          |          |     |  |
|             |                  |                      |                              |                 |                |                        | SSLNAKMEECVK                  | 70               | 706.329        | 2      | 1410.644        | 1410.648           | 2.9              | Oxidation (M)             |     |          |   |          |          |     |  |
|             |                  |                      |                              |                 |                |                        | SGSANAYMQSKR                  | 63               | 650.307        | 2      | 1298.600        | 1298.604           | 2.6              |                           |     |          |   |          |          |     |  |
|             |                  |                      |                              |                 |                |                        | IPNANVSGSHR                   | 62               | 384.535        | 3      | 1150.583        | 1150.584           | 1.5              |                           |     |          |   |          |          |     |  |
|             |                  |                      |                              |                 |                |                        | SGSANAYMQSKR                  | 59               | 433.874        | 3      | 1298.601        | 1298.604           | 1.9              |                           |     |          |   |          |          |     |  |
|             |                  |                      |                              |                 |                |                        | TFRIPNANVSGSHR                | 57               | 519.274        | 3      | 1554.800        | 1554.802           | 1.1              |                           |     |          |   |          |          |     |  |
|             |                  |                      |                              |                 |                |                        | AAAIGWMPVASGMPAPPRQER         | 54               | 774.719        | 3      | 2321.136        | 2321.141           | 2.2              | 2 Oxidation (M)           |     |          |   |          |          |     |  |
|             |                  |                      |                              |                 |                |                        | SGSANAYMQSK                   | 47               | 580.255        | 2      | 1158.495        | 1158.498           | 2.5              | Oxidation (M)             |     |          |   |          |          |     |  |
|             |                  |                      |                              |                 |                |                        | CVERTPLNSNR                   | 39               | 440.222        | 3      | 1317.644        | 1317.646           | 1.6              |                           |     |          |   |          |          |     |  |
|             |                  |                      |                              |                 |                |                        | IYHQNRADK                     | 37               | 636.824        | 2      | 1271.634        | 1271.637           | 2.2              |                           |     |          |   |          |          |     |  |
|             |                  |                      |                              |                 |                |                        | Kv4.1                         | 73               | 284            | 100%   | 8               | 9                  |                  | 16 LANSTASVSR             | 72  | 503.269  | 2 | 1004.523 | 1004.525 | 2   |  |
|             |                  |                      |                              |                 |                |                        |                               |                  |                |        |                 |                    |                  | NTLDRYPDTLLGSSEK          | 69  | 603.638  | 3 | 1807.891 | 1807.895 | 2.1 |  |
|             |                  |                      |                              |                 |                |                        |                               |                  |                |        |                 |                    |                  | AAAVGWLPLAQQLPPAPEVK      | 61  | 718.408  | 3 | 2152.201 | 2152.204 | 1.7 |  |
|             |                  |                      |                              |                 |                |                        |                               |                  |                |        |                 |                    |                  | AAAVGWLPLAQQLPPAPEVK      | 54  | 1077.106 | 2 | 2152.197 | 2152.204 | 3.2 |  |
|             |                  |                      |                              |                 |                |                        |                               |                  |                |        |                 |                    |                  | NSSLGTPCLLPETVK           | 49  | 808.420  | 2 | 1614.826 | 1614.829 | 1.8 |  |
|             |                  |                      |                              |                 |                |                        |                               |                  |                |        |                 |                    |                  | ASRGDEVLVVNVSGR           | 48  | 519.949  | 3 | 1556.825 | 1556.827 | 1.6 |  |
| SGTTNAFLQYK | 43               | 615.310              | 2                            | 1228.606        | 1228.609       | 2.1                    |                               |                  |                |        |                 |                    |                  |                           |     |          |   |          |          |     |  |
| RSPAPQTR    | 40               | 456.753              | 2                            | 911.492         | 911.494        | 2.3                    |                               |                  |                |        |                 |                    |                  |                           |     |          |   |          |          |     |  |
| IYHQNRADK   | 37               | 636.824              | 2                            | 1271.634        | 1271.637       | 2.2                    |                               |                  |                |        |                 |                    |                  |                           |     |          |   |          |          |     |  |
| Kv4.3       | 74               | 844                  | 100%                         | 14              | 22             |                        |                               |                  |                |        |                 |                    |                  | 29 RNGLLNEALELTGTPEEEQMGK | 119 | 810.403  | 3 | 2428.186 | 2428.190 | 1.8 |  |
|             |                  |                      |                              |                 |                |                        | SMQELSTLHIQSQEQSLTTSR         | 106              | 810.734        | 3      | 2429.181        | 2429.186           | 1.8              |                           |     |          |   |          |          |     |  |
|             |                  |                      |                              |                 |                |                        | TTGLSYLVDDPLLSVR              | 102              | 874.973        | 2      | 1747.932        | 1747.936           | 2                |                           |     |          |   |          |          |     |  |
|             |                  |                      |                              |                 |                |                        | TTGLSYLVDDPLLSVR              | 102              | 583.652        | 3      | 1747.933        | 1747.936           | 1.3              |                           |     |          |   |          |          |     |  |
|             |                  |                      |                              |                 |                |                        | SMQELSTLHIQSQEQSLTTSR         | 89               | 816.066        | 3      | 2445.176        | 2445.181           | 1.6              | Oxidation (M)             |     |          |   |          |          |     |  |
|             |                  |                      |                              |                 |                |                        | KTTHLPNSNLPATR                | 74               | 517.285        | 3      | 1548.834        | 1548.837           | 1.9              |                           |     |          |   |          |          |     |  |
|             |                  |                      |                              |                 |                |                        | RQDELIVLNVSGRR                | 65               | 552.315        | 3      | 1653.924        | 1653.927           | 1.9              |                           |     |          |   |          |          |     |  |
|             |                  |                      |                              |                 |                |                        | TGSSNAYLHSCR                  | 63               | 440.892        | 3      | 1319.656        | 1319.658           | 1.9              |                           |     |          |   |          |          |     |  |
|             |                  |                      |                              |                 |                |                        | TGSSNAYLHSK                   | 59               | 388.859        | 3      | 1163.555        | 1163.557           | 1.6              |                           |     |          |   |          |          |     |  |
|             |                  |                      |                              |                 |                |                        | SKKTTHLPNSNLPATR              | 57               | 588.994        | 3      | 1763.960        | 1763.964           | 2.2              |                           |     |          |   |          |          |     |  |
|             |                  |                      |                              |                 |                |                        | EFFFNEDTK                     | 55               | 588.763        | 2      | 1175.511        | 1175.514           | 1.7              |                           |     |          |   |          |          |     |  |
|             |                  |                      |                              |                 |                |                        | TTLERYPDTLLGSTEK              | 54               | 608.650        | 3      | 1822.927        | 1822.931           | 2.1              |                           |     |          |   |          |          |     |  |
|             |                  |                      |                              |                 |                |                        | TGSSNAYLHSK                   | 53               | 582.785        | 2      | 1163.555        | 1163.557           | 2.1              |                           |     |          |   |          |          |     |  |
|             |                  |                      |                              |                 |                |                        | TTHLPNSNLPATR                 | 50               | 711.377        | 2      | 1420.739        | 1420.742           | 2.2              |                           |     |          |   |          |          |     |  |
|             |                  |                      |                              |                 |                |                        | TTLERYPDTLLGSTEK              | 46               | 912.471        | 2      | 1822.927        | 1822.931           | 2.2              |                           |     |          |   |          |          |     |  |
|             |                  |                      |                              |                 |                |                        | ADDGLRPNCK                    | 42               | 382.517        | 3      | 1144.528        | 1144.529           | 1.5              |                           |     |          |   |          |          |     |  |
|             |                  |                      |                              |                 |                |                        | AAAIGWMPVANCPMLAPADK          | 42               | 727.692        | 3      | 2180.053        | 2180.058           | 2.1              |                           |     |          |   |          |          |     |  |
|             |                  |                      |                              |                 |                |                        | TTHLPNSNLPATR                 | 41               | 474.587        | 3      | 1420.740        | 1420.742           | 1.8              |                           |     |          |   |          |          |     |  |
|             |                  |                      |                              |                 |                |                        | AAAIGWMPVANCPMLAPADK          | 41               | 1091.034       | 2      | 2180.053        | 2180.058           | 2.3              |                           |     |          |   |          |          |     |  |
|             |                  |                      |                              |                 |                |                        | IYHQNRADK                     | 37               | 636.824        | 2      | 1271.634        | 1271.637           | 2.2              |                           |     |          |   |          |          |     |  |
|             |                  |                      |                              |                 |                |                        | ADDGLRPNCK                    | 36               | 573.271        | 2      | 1144.527        | 1144.529           | 2.2              |                           |     |          |   |          |          |     |  |
|             |                  |                      |                              |                 |                |                        | SKKTTHLPNSNLPATR              | 33               | 441.998        | 4      | 1763.961        | 1763.964           | 1.5              |                           |     |          |   |          |          |     |  |
| KChIP1      | 27               | 178                  | 100%                         | 4               | 4              |                        | 18 NECPSGVVNEETFK             | 106              | 805.360        | 2      | 1608.705        | 1608.709           | 2.2              |                           |     |          |   |          |          |     |  |
|             |                  |                      |                              |                 |                |                        | SLQLFQNVN                     | 59               | 540.280        | 2      | 1078.546        | 1078.548           | 1.5              |                           |     |          |   |          |          |     |  |
|             |                  |                      |                              |                 |                |                        | AIYDMMGK                      | 36               | 480.711        | 2      | 959.407         | 959.409            | 1.9              | 2 Oxidation (M)           |     |          |   |          |          |     |  |
|             |                  |                      |                              |                 |                |                        | ELQVLYR                       | 31               | 460.763        | 2      | 919.511         | 919.513            | 1.4              |                           |     |          |   |          |          |     |  |
| KChIP2      | 29               | 307                  | 100%                         | 6               | 8              |                        | 20 NECPSGIVNEENFK             | 110              | 818.865        | 2      | 1635.716        | 1635.720           | 2.2              |                           |     |          |   |          |          |     |  |
|             |                  |                      |                              |                 |                |                        | ESLSSESRDLGSDYDQLTGHPGSPK     | 78               | 891.418        | 3      | 2671.231        | 2671.236           | 2                |                           |     |          |   |          |          |     |  |
|             |                  |                      |                              |                 |                |                        | GFKNECPSGIVNEENFK             | 68               | 656.974        | 3      | 1967.901        | 1967.905           | 2                |                           |     |          |   |          |          |     |  |
|             |                  |                      |                              |                 |                |                        | SMQLFDNVI                     | 53               | 541.762        | 2      | 1081.510        | 1081.511           | 1.3              | Oxidation (M)             |     |          |   |          |          |     |  |
|             |                  |                      |                              |                 |                |                        | SMQLFDNVI                     | 47               | 533.765        | 2      | 1065.515        | 1065.516           | 1.5              |                           |     |          |   |          |          |     |  |
|             |                  |                      |                              |                 |                |                        | ESLSSESRDLGSDYDQLTGHPGSPK     | 35               | 700.839        | 4      | 2799.325        | 2799.331           | 2                |                           |     |          |   |          |          |     |  |
|             |                  |                      |                              |                 |                |                        | ESLSSESRDLGSDYDQLTGHPGSPK     | 32               | 668.815        | 4      | 2671.230        | 2671.236           | 2.4              |                           |     |          |   |          |          |     |  |
| ELQVLYR     | 31               | 460.763              | 2                            | 919.511         | 919.513        | 1.4                    |                               |                  |                |        |                 |                    |                  |                           |     |          |   |          |          |     |  |
| KChIP3      | 30               | 260                  | 100%                         | 5               | 7              |                        | 29 HOPEGLDQLQAQTK             | 80               | 531.605        | 3      | 1591.792        | 1591.795           | 1.9              |                           |     |          |   |          |          |     |  |

|        |    |     |      |    |    |                        |     |          |   |          |          |                              |
|--------|----|-----|------|----|----|------------------------|-----|----------|---|----------|----------|------------------------------|
|        |    |     |      |    |    | HOPEGLDQLOAQT          | 80  | 796.903  | 2 | 1591.792 | 1591.795 | 2.3                          |
|        |    |     |      |    |    | DENIMNSMLFENVI         | 69  | 898.912  | 2 | 1795.809 | 1795.812 | 1.6                          |
|        |    |     |      |    |    | ASDGNLLGDPGRIPLSKR     | 64  | 622.677  | 3 | 1865.008 | 1865.012 | 1.9                          |
|        |    |     |      |    |    | HTYPILREDAPLEHVER      | 46  | 519.521  | 4 | 2074.056 | 2074.060 | 1.6                          |
|        |    |     |      |    |    | ASDGNLLGDPGRIPLSKR     | 35  | 467.259  | 4 | 1865.009 | 1865.012 | 1.6                          |
|        |    |     |      |    |    | ESIKWQRPR              | 31  | 400.559  | 3 | 1198.655 | 1198.657 | 1.6                          |
| KChIP4 | 29 | 744 | 100% | 10 | 18 | 43 NECPGSGVNEETFK      | 106 | 805.360  | 2 | 1608.705 | 1608.709 | 2.2                          |
|        |    |     |      |    |    | TSSPAIQNSVEDELEMATVR   | 97  | 1097.017 | 2 | 2192.019 | 2192.027 | 3.3 Oxidation (M)            |
|        |    |     |      |    |    | HRPEALLELEAOSK         | 92  | 810.937  | 2 | 1619.860 | 1619.863 | 2                            |
|        |    |     |      |    |    | HRPEALLELEAOSK         | 83  | 540.961  | 3 | 1619.861 | 1619.863 | 1.3                          |
|        |    |     |      |    |    | HRPEALLELEAOSK         | 79  | 540.961  | 3 | 1619.861 | 1619.863 | 1.4                          |
|        |    |     |      |    |    | DGVVTIDEFIESCQKDENIMR  | 77  | 833.388  | 3 | 2497.141 | 2497.146 | 2.1                          |
|        |    |     |      |    |    | DGVVTIDEFIESCQKDENIMR  | 76  | 838.723  | 3 | 2513.146 | 2513.141 | 1.7 Oxidation (M)            |
|        |    |     |      |    |    | TSSPAIQNSVEDELEMATVR   | 75  | 1089.015 | 2 | 2176.015 | 2176.032 | 7.4                          |
|        |    |     |      |    |    | TSSPAIQNSVEDELEMATVR   | 61  | 731.681  | 3 | 2192.022 | 2192.027 | 2.3 Oxidation (M)            |
|        |    |     |      |    |    | DGVVTIDEFIESCQKDENIMR  | 61  | 833.390  | 3 | 2497.148 | 2497.146 | 0.5                          |
|        |    |     |      |    |    | CTYPVLKEDAPR           | 53  | 483.577  | 3 | 1447.711 | 1447.713 | 1.6                          |
|        |    |     |      |    |    | QHVETFFOK              | 49  | 573.782  | 2 | 1145.549 | 1145.551 | 1.6 Gln->pyro-Glu (N-term Q) |
|        |    |     |      |    |    | SMQLFENVI              | 43  | 548.770  | 2 | 1095.525 | 1095.527 | 1.7 Oxidation (M)            |
|        |    |     |      |    |    | QHVETFFOK              | 41  | 388.532  | 3 | 1162.575 | 1162.577 | 1.5                          |
|        |    |     |      |    |    | DENIMR                 | 41  | 777.354  | 1 | 776.347  | 776.349  | 2.2                          |
|        |    |     |      |    |    | AIYDMMGK               | 36  | 480.711  | 2 | 959.407  | 959.409  | 1.9 2 Oxidation (M)          |
|        |    |     |      |    |    | QHVETFFOKMDK           | 35  | 513.253  | 3 | 1536.737 | 1536.740 | 1.5                          |
|        |    |     |      |    |    | DENIMR                 | 34  | 389.181  | 2 | 776.347  | 776.349  | 1.7                          |
| DPP6   | 92 | 825 | 100% | 25 | 29 | 28 MFDLEANEEVQK        | 98  | 726.836  | 2 | 1451.658 | 1451.660 | 1.7                          |
|        |    |     |      |    |    | VSALEDQQLIHATADEK      | 91  | 710.034  | 3 | 2127.080 | 2127.085 | 2.1                          |
|        |    |     |      |    |    | KHEDESEAWLHRQNEEPPVFSK | 81  | 649.560  | 4 | 2594.209 | 2594.215 | 2.1                          |
|        |    |     |      |    |    | IYFLSTEDLPR            | 71  | 677.354  | 2 | 1352.694 | 1352.698 | 2.5                          |
|        |    |     |      |    |    | LYASAFSER              | 69  | 522.261  | 2 | 1042.507 | 1042.508 | 1.4                          |
|        |    |     |      |    |    | IHFQHTAELITQLIK        | 65  | 598.008  | 3 | 1791.002 | 1791.004 | 1.4                          |
|        |    |     |      |    |    | VAVTWLNLR              | 60  | 479.776  | 2 | 957.538  | 957.540  | 1.5                          |
|        |    |     |      |    |    | IPHGDQSLDPPEVSNK       | 59  | 634.317  | 3 | 1899.929 | 1899.933 | 2.1                          |
|        |    |     |      |    |    | VQDKLPTATAKEEEED       | 58  | 644.639  | 3 | 1930.897 | 1930.901 | 2.1                          |
|        |    |     |      |    |    | LPTATAKEEEED           | 56  | 731.331  | 2 | 1460.648 | 1460.652 | 2.5                          |
|        |    |     |      |    |    | RRMFDLEANEEVQK         | 51  | 594.291  | 3 | 1779.852 | 1779.857 | 3 Oxidation (M)              |
|        |    |     |      |    |    | RRMFDLEANEEVQK         | 51  | 588.960  | 3 | 1763.859 | 1763.862 | 1.9                          |
|        |    |     |      |    |    | RLGFLEEKDQMEAVR        | 51  | 607.648  | 3 | 1819.922 | 1819.925 | 1.7                          |
|        |    |     |      |    |    | DQMEAVR                | 51  | 424.699  | 2 | 847.384  | 847.386  | 1.8                          |
|        |    |     |      |    |    | YLGHLGLDNRAYEMTK       | 45  | 627.648  | 3 | 1879.921 | 1879.925 | 2                            |
|        |    |     |      |    |    | AIRYEISPDK             | 45  | 596.321  | 2 | 1190.627 | 1190.630 | 2                            |
|        |    |     |      |    |    | LLQEVN                 | 44  | 379.231  | 2 | 756.448  | 756.449  | 1.6                          |
|        |    |     |      |    |    | KGSVILR                | 42  | 386.755  | 2 | 771.495  | 771.497  | 1.7                          |
|        |    |     |      |    |    | CDGRGSGFOGTK           | 41  | 635.284  | 2 | 1268.553 | 1268.557 | 2.7                          |
|        |    |     |      |    |    | GSGFOGTK               | 40  | 391.195  | 2 | 780.375  | 780.377  | 1.5                          |
|        |    |     |      |    |    | YLGHLGLDNR             | 38  | 579.305  | 2 | 1156.596 | 1156.599 | 2.4                          |
|        |    |     |      |    |    | AYEMTK                 | 38  | 371.675  | 2 | 741.336  | 741.337  | 1.1                          |
|        |    |     |      |    |    | AIRYEISPDK             | 38  | 397.883  | 3 | 1190.628 | 1190.630 | 1.6                          |
|        |    |     |      |    |    | IHDPEAK                | 37  | 405.210  | 2 | 808.406  | 808.408  | 2                            |
|        |    |     |      |    |    | ILSYDEK                | 35  | 867.443  | 1 | 866.436  | 866.439  | 2.8                          |
|        |    |     |      |    |    | CDGRGSGFOGTK           | 35  | 423.859  | 3 | 1268.555 | 1268.557 | 1.7                          |
|        |    |     |      |    |    | EFIYRER                | 32  | 506.763  | 2 | 1011.512 | 1011.514 | 1.8                          |
|        |    |     |      |    |    | DQMEAVR                | 32  | 432.697  | 2 | 863.379  | 863.381  | 1.8 Oxidation (M)            |
|        |    |     |      |    |    | AINDRQMPK              | 31  | 544.778  | 2 | 1087.542 | 1087.544 | 2.2 Oxidation (M)            |
| DPP10  | 91 | 652 | 100% | 19 | 20 | 24 KYEMTSDTWLSK        | 92  | 744.854  | 2 | 1487.694 | 1487.697 | 2                            |
|        |    |     |      |    |    | YFLLENNSVMK            | 78  | 679.344  | 2 | 1356.673 | 1356.675 | 1.6                          |
|        |    |     |      |    |    | ILHIDDYELPLQLSFPK      | 75  | 681.037  | 3 | 2040.089 | 2040.093 | 1.9                          |
|        |    |     |      |    |    | GYGGYIASMILK           | 74  | 636.835  | 2 | 1271.656 | 1271.658 | 1.5                          |
|        |    |     |      |    |    | MKQEQQPTPGAR           | 71  | 693.842  | 2 | 1385.669 | 1385.672 | 2.6 Oxidation (M)            |
|        |    |     |      |    |    | LYASAFSER              | 69  | 522.261  | 2 | 1042.507 | 1042.508 | 1.4                          |
|        |    |     |      |    |    | IGSVEAKDQVAAVK         | 65  | 707.897  | 2 | 1413.780 | 1413.783 | 2.2                          |
|        |    |     |      |    |    | VPVVSLLHITDNPSR        | 57  | 511.950  | 3 | 1532.829 | 1532.831 | 1.6                          |
|        |    |     |      |    |    | YVLLAYDVK              | 53  | 542.307  | 2 | 1082.599 | 1082.601 | 1.8                          |
|        |    |     |      |    |    | CGAVVAPISDMK           | 50  | 624.309  | 2 | 1246.603 | 1246.605 | 1.9                          |
|        |    |     |      |    |    | QEQQPTPGAR             | 49  | 556.277  | 2 | 1110.539 | 1110.542 | 2.2                          |
|        |    |     |      |    |    | VHFQHSALIK             | 47  | 436.906  | 3 | 1307.697 | 1307.699 | 1.6                          |

|               |    |         |   |          |          |     |
|---------------|----|---------|---|----------|----------|-----|
| FTGALYPK      | 47 | 448.747 | 2 | 895.479  | 895.480  | 0.9 |
| FFMTVPVK      | 45 | 484.767 | 2 | 967.519  | 967.520  | 1.4 |
| SEQITVR       | 44 | 416.729 | 2 | 831.444  | 831.445  | 1.7 |
| HSLSPDLK      | 42 | 448.745 | 2 | 895.475  | 895.476  | 1.7 |
| QNEEPVFSRDGSK | 41 | 746.853 | 2 | 1491.692 | 1491.695 | 2.4 |
| QNEEPVFSR     | 40 | 553.266 | 2 | 1104.518 | 1104.520 | 2   |
| QPYIDSK       | 37 | 425.718 | 2 | 849.422  | 849.423  | 2   |
| RLSIFGK       | 35 | 410.755 | 2 | 819.495  | 819.497  | 1.4 |

**Supplemental Table 3.** Proteins identified in immunoprecipitated brain Kv4.2 channel complexes using MudPIT experiments.

| Protein         | Molecular weight | Mascot protein score | Scaffold protein probability | Unique peptides | Total peptides | % AA sequence coverage | Peptide sequence            | Mascot ion score | m/z (observed) | Charge | Mass (observed) | Mass (theoretical) | Mass error (ppm) | Modifications |
|-----------------|------------------|----------------------|------------------------------|-----------------|----------------|------------------------|-----------------------------|------------------|----------------|--------|-----------------|--------------------|------------------|---------------|
| Kv4.2           | 71               | 1271                 | 100%                         | 8               | 17             |                        | 14 LQDDADTDNTGESALPTMTAR    | 126              | 1111.50        | 2      | 2220.98         | 2220.98            | 1.3              |               |
|                 |                  |                      |                              |                 |                |                        | NGLLSNQLQSSEDEPAFISK        | 120              | 1088.99        | 2      | 2175.97         | 2176.06            | 43.7             |               |
|                 |                  |                      |                              |                 |                |                        | LQDDADTDNTGESALPTMTAR       | 118              | 1111.91        | 2      | 2221.81         | 2220.98            | 77.9             |               |
|                 |                  |                      |                              |                 |                |                        | NGLLSNQLQSSEDEPAFISK        | 107              | 1089.34        | 2      | 2176.67         | 2176.06            | 181.6            |               |
|                 |                  |                      |                              |                 |                |                        | IPNANVSGSHR                 | 90               | 576.78         | 2      | 1151.55         | 1150.58            | 29               |               |
|                 |                  |                      |                              |                 |                |                        | RNGLLSNQLQSSEDEPAFISK       | 89               | 1167.18        | 2      | 2332.35         | 2332.17            | 77.8             |               |
|                 |                  |                      |                              |                 |                |                        | NGLLSNQLQSSEDEPAFISK        | 88               | 1089.42        | 2      | 2176.82         | 2176.06            | 110.8            |               |
|                 |                  |                      |                              |                 |                |                        | RNGLLSNQLQSSEDEPAFISK       | 78               | 1167.47        | 2      | 2332.93         | 2332.17            | 101.3            |               |
|                 |                  |                      |                              |                 |                |                        | TQDALIVLNVSGTR              | 74               | 744.08         | 2      | 1486.14         | 1485.82            | 219.9            |               |
|                 |                  |                      |                              |                 |                |                        | TQDALIVLNVSGTR              | 72               | 744.33         | 2      | 1486.64         | 1485.82            | 119.3            |               |
|                 |                  |                      |                              |                 |                |                        | GSVQELSTGIQR                | 68               | 665.93         | 2      | 1329.85         | 1329.73            | 94.4             |               |
|                 |                  |                      |                              |                 |                |                        | TRIPNANVSGSHR               | 56               | 778.82         | 2      | 1555.62         | 1554.80            | 116.1            |               |
|                 |                  |                      |                              |                 |                |                        | TQDALIVLNVSGTR              | 42               | 744.24         | 2      | 1486.46         | 1485.82            | 238.4            |               |
|                 |                  |                      |                              |                 |                |                        | RNGLLSNQLQSSEDEPAFISK       | 40               | 778.71         | 3      | 2333.10         | 2332.17            | 27.9             |               |
|                 |                  |                      |                              |                 |                |                        | IYHQNQR                     | 36               | 479.73         | 2      | 957.45          | 957.48             | 30.7             |               |
|                 |                  |                      |                              |                 |                |                        | IYHQNQR                     | 35               | 479.76         | 2      | 957.51          | 957.48             | 31.9             |               |
|                 |                  |                      |                              |                 |                |                        | IYHQNQR                     | 32               | 479.83         | 2      | 957.64          | 957.48             | 170.8            |               |
| Kv4.1           | 73               | 260                  | 100%                         | 3               | 4              |                        | 8 LAEDEEAQAGEGALPAGSSLR     | 80               | 1149.29        | 2      | 2296.57         | 2296.08            | 214.1            |               |
|                 |                  |                      |                              |                 |                |                        | LAEDEEAQAGEGALPAGSSLR       | 79               | 1149.48        | 2      | 2296.94         | 2296.08            | 63.7             |               |
|                 |                  |                      |                              |                 |                |                        | SGTTNAFLQYK                 | 56               | 615.74         | 2      | 1229.46         | 1228.61            | 123              |               |
|                 |                  |                      |                              |                 |                |                        | NSSLGTPCLLPETVK             | 45               | 808.74         | 2      | 1615.47         | 1614.83            | 219.8            |               |
| Kv4.3           | 74               | 1130                 | 100%                         | 8               | 19             |                        | 15 QDELIVLNVSGR             | 90               | 672.00         | 2      | 1341.99         | 1341.73            | 200.8            |               |
|                 |                  |                      |                              |                 |                |                        | QDELIVLNVSGR                | 90               | 672.28         | 2      | 1342.54         | 1341.73            | 141.2            |               |
|                 |                  |                      |                              |                 |                |                        | QDELIVLNVSGR                | 77               | 672.27         | 2      | 1342.52         | 1341.73            | 154.5            |               |
|                 |                  |                      |                              |                 |                |                        | TTGLSYLVDDPILLSVR           | 76               | 875.36         | 2      | 1748.71         | 1747.94            | 130.8            |               |
|                 |                  |                      |                              |                 |                |                        | TTGLSYLVDDPILLSVR           | 75               | 875.30         | 2      | 1748.59         | 1747.94            | 198.5            |               |
|                 |                  |                      |                              |                 |                |                        | TTGLSYLVDDPILLSVR           | 72               | 875.30         | 2      | 1748.58         | 1747.94            | 201.9            |               |
|                 |                  |                      |                              |                 |                |                        | KTTHLPNSNLPATR              | 66               | 775.77         | 2      | 1549.52         | 1548.84            | 206.8            |               |
|                 |                  |                      |                              |                 |                |                        | QDELIVLNVSGR                | 66               | 672.36         | 2      | 1342.70         | 1341.73            | 16.8             |               |
|                 |                  |                      |                              |                 |                |                        | KTTHLPNSNLPATR              | 61               | 711.46         | 2      | 1420.91         | 1420.74            | 120.7            |               |
|                 |                  |                      |                              |                 |                |                        | TGSSNAYLHSK                 | 58               | 583.17         | 2      | 1164.33         | 1163.56            | 196.1            |               |
|                 |                  |                      |                              |                 |                |                        | TTGLSYLVDDPILLSVR           | 56               | 875.45         | 2      | 1748.89         | 1747.94            | 25               |               |
|                 |                  |                      |                              |                 |                |                        | KTTHLPNSNLPATR              | 51               | 775.86         | 2      | 1549.71         | 1548.84            | 80.9             |               |
|                 |                  |                      |                              |                 |                |                        | TTTHLPNSNLPATR              | 51               | 711.76         | 2      | 1421.51         | 1420.74            | 162.1            |               |
|                 |                  |                      |                              |                 |                |                        | NGLLNEALELGTPEEEQMGK        | 50               | 1137.44        | 2      | 2272.87         | 2272.09            | 95.8             |               |
|                 |                  |                      |                              |                 |                |                        | TTGLSYLVDDPILLSVR           | 50               | 875.35         | 2      | 1748.69         | 1747.94            | 139.5            |               |
|                 |                  |                      |                              |                 |                |                        | TGSSNAYLHSK                 | 43               | 583.12         | 2      | 1164.23         | 1163.56            | 277.9            |               |
|                 |                  |                      |                              |                 |                |                        | IYHQNQR                     | 35               | 479.76         | 2      | 957.51          | 957.48             | 31.9             |               |
| IYHQNQR         | 32               | 479.83               | 2                            | 957.64          | 957.48         | 170.8                  |                             |                  |                |        |                 |                    |                  |               |
| TTLERYPTLLGSTEK | 31               | 912.89               | 2                            | 1823.76         | 1822.93        | 94.5                   |                             |                  |                |        |                 |                    |                  |               |
| KChIP2          | 31               | 109                  | 100%                         | 2               | 2              |                        | 10 DLDGSYDQLTGHPGPKS        | 80               | 942.87         | 2      | 1883.72         | 1882.87            | 79               |               |
|                 |                  |                      |                              |                 |                |                        | EHVESFFQK                   | 29               | 576.17         | 2      | 1150.32         | 1149.55            | 199.7            |               |
| KChIP3          | 33               | 564                  | 100%                         | 4               | 10             |                        | 13 HOPEGLDQLQAQTK           | 79               | 796.99         | 2      | 1591.96         | 1591.80            | 101.4            |               |
|                 |                  |                      |                              |                 |                |                        | HOPEGLDQLQAQTK              | 74               | 797.23         | 2      | 1592.45         | 1591.80            | 215.8            |               |
|                 |                  |                      |                              |                 |                |                        | HOPEGLDQLQAQTK              | 68               | 797.21         | 2      | 1592.40         | 1591.80            | 245.3            |               |
|                 |                  |                      |                              |                 |                |                        | HOPEGLDQLQAQTK              | 59               | 797.27         | 2      | 1592.52         | 1591.80            | 172.6            |               |
|                 |                  |                      |                              |                 |                |                        | HOPEGLDQLQAQTK              | 57               | 797.32         | 2      | 1592.63         | 1591.80            | 106.5            |               |
|                 |                  |                      |                              |                 |                |                        | HOPEGLDQLQAQTK              | 52               | 797.14         | 2      | 1592.27         | 1591.80            | 298.5            |               |
|                 |                  |                      |                              |                 |                |                        | EDAPLEHVER                  | 52               | 597.84         | 2      | 1193.66         | 1193.57            | 76.4             |               |
|                 |                  |                      |                              |                 |                |                        | EDAPLEHVER                  | 51               | 598.15         | 2      | 1194.29         | 1193.57            | 228.5            |               |
|                 |                  |                      |                              |                 |                |                        | KELQSLYR                    | 40               | 518.95         | 2      | 1035.89         | 1035.57            | 310.5            |               |
|                 |                  |                      |                              |                 |                |                        | ELQSLYR                     | 32               | 908.63         | 1      | 907.62          | 907.48             | 162.4            |               |
| KChIP4          | 29               | 664                  | 100%                         | 8               | 12             |                        | 38 TSSPAIQNSVEDELEMATVR     | 102              | 1089.03        | 2      | 2176.05         | 2176.03            | 9                |               |
|                 |                  |                      |                              |                 |                |                        | RVESISAQLEEASSTGGFLYAQNNTK  | 79               | 1401.11        | 2      | 2800.20         | 2799.37            | 58.5             |               |
|                 |                  |                      |                              |                 |                |                        | RVESISAQLEEASSTGGFLYAQNNTKR | 74               | 986.45         | 3      | 2956.34         | 2955.47            | 44.2             |               |
|                 |                  |                      |                              |                 |                |                        | HRPEALELLEAQSK              | 70               | 811.39         | 2      | 1620.76         | 1619.86            | 61.8             |               |
|                 |                  |                      |                              |                 |                |                        | RVESISAQLEEASSTGGFLYAQNNTKR | 66               | 986.47         | 3      | 2956.38         | 2955.47            | 29.7             |               |
|                 |                  |                      |                              |                 |                |                        | FTKKELQILYR                 | 50               | 720.39         | 2      | 1438.76         | 1437.83            | 52.5             |               |
|                 |                  |                      |                              |                 |                |                        | DGVVTIDFIESCQK              | 43               | 870.65         | 2      | 1739.28         | 1738.81            | 271.6            |               |
|                 |                  |                      |                              |                 |                |                        | QHVETFFQK                   | 43               | 582.65         | 2      | 1163.28         | 1162.58            | 258.2            |               |
|                 |                  |                      |                              |                 |                |                        | KELQILYR                    | 40               | 532.21         | 2      | 1062.41         | 1061.62            | 197.2            |               |
|                 |                  |                      |                              |                 |                |                        | KELQILYR                    | 35               | 531.96         | 2      | 1061.90         | 1061.62            | 258.6            |               |
|                 |                  |                      |                              |                 |                |                        | QHVETFFQK                   | 32               | 582.72         | 2      | 1163.42         | 1162.58            | 132.6            |               |
|                 |                  |                      |                              |                 |                |                        | QHVETFFQK                   | 30               | 1163.65        | 1      | 1162.64         | 1162.58            | 56.4             |               |

|    |                              |     |         |   |         |         |       |
|----|------------------------------|-----|---------|---|---------|---------|-------|
| 32 | VSALEDOQFLIHATADEK           | 124 | 1064.90 | 2 | 2127.78 | 2127.08 | 141.6 |
|    | EGVIYNGLSDWLYEEEEILK         | 111 | 1135.37 | 2 | 2268.72 | 2269.12 | 176.2 |
|    | VSALEDOQFLIHATADEK           | 111 | 1064.46 | 2 | 2126.90 | 2127.08 | 85.2  |
|    | VSALEDOQFLIHATADEK           | 106 | 1064.56 | 2 | 2127.10 | 2127.08 | 6.8   |
|    | VTEDLFSDFK                   | 104 | 715.31  | 2 | 1428.60 | 1427.68 | 60.3  |
|    | KKVTEDLFSDFK                 | 102 | 843.32  | 2 | 1684.62 | 1683.87 | 150.9 |
|    | VTEDLFSDFK                   | 99  | 715.27  | 2 | 1428.52 | 1427.68 | 111.5 |
|    | VTEDLFSDFK                   | 99  | 715.13  | 2 | 1428.24 | 1427.68 | 306.9 |
|    | VTEDLFSDFK                   | 99  | 715.32  | 2 | 1428.63 | 1427.68 | 37.9  |
|    | VTEDLFSDFK                   | 98  | 715.32  | 2 | 1428.62 | 1427.68 | 45.6  |
|    | KKVTEDLFSDFK                 | 96  | 843.34  | 2 | 1684.67 | 1683.87 | 122.5 |
|    | KVTEDLFSDFK                  | 92  | 779.38  | 2 | 1556.75 | 1555.78 | 14.8  |
|    | VSALEDOQFLIHATADEK           | 90  | 1064.81 | 2 | 2127.60 | 2127.08 | 230   |
|    | KKVTEDLFSDFK                 | 89  | 842.76  | 2 | 1683.50 | 1683.87 | 223.3 |
|    | VTEDLFSDFK                   | 84  | 715.25  | 2 | 1428.48 | 1427.68 | 142.4 |
|    | HLYSANTVDDFNR                | 83  | 776.40  | 2 | 1550.78 | 1550.71 | 44.6  |
|    | IYFLSTEDLPR                  | 83  | 677.85  | 2 | 1353.69 | 1352.70 | 6.4   |
|    | IYFLSTEDLPR                  | 81  | 677.42  | 2 | 1352.83 | 1352.70 | 97.7  |
|    | NKIYFLSTEDLPR                | 80  | 798.33  | 2 | 1594.65 | 1594.84 | 117   |
|    | HLYSANTVDDFNR                | 79  | 776.77  | 2 | 1551.53 | 1550.71 | 118.9 |
|    | KVTEDLFSDFK                  | 79  | 779.00  | 2 | 1555.98 | 1555.78 | 128.4 |
|    | KVTEDLFSDFK                  | 79  | 779.27  | 2 | 1556.53 | 1555.78 | 157.6 |
|    | NKIYFLSTEDLPR                | 79  | 798.43  | 2 | 1594.85 | 1594.84 | 9     |
|    | VSALEDOQFLIHATADEK           | 79  | 710.33  | 3 | 2127.97 | 2127.08 | 54.5  |
|    | EGVIYNGLSDWLYEEEEILK         | 78  | 1135.53 | 2 | 2269.05 | 2269.12 | 29    |
|    | IYFLSTEDLPR                  | 78  | 677.49  | 2 | 1352.96 | 1352.70 | 192.9 |
|    | NKIYFLSTEDLPR                | 77  | 798.86  | 2 | 1595.70 | 1594.84 | 85.6  |
|    | HLYSANTVDDFNR                | 74  | 776.43  | 2 | 1550.84 | 1550.71 | 81.4  |
|    | HLYSANTVDDFNR                | 74  | 776.78  | 2 | 1551.54 | 1550.71 | 113.3 |
|    | IYFLSTEDLPR                  | 74  | 677.71  | 2 | 1353.40 | 1352.70 | 220.1 |
|    | IYFLSTEDLPR                  | 74  | 677.75  | 2 | 1353.49 | 1352.70 | 155.8 |
|    | KKVTEDLFSDFK                 | 74  | 843.01  | 2 | 1684.00 | 1683.87 | 74.7  |
|    | EGVIYNGLSDWLYEEEEILK         | 73  | 1135.96 | 2 | 2269.91 | 2269.12 | 89.8  |
|    | VTEDLFSDFKIHDPK              | 73  | 1110.07 | 2 | 2218.12 | 2218.08 | 18    |
|    | YEISPDKEYVLFVSNVPEVYQHSHTGYY | 73  | 1285.82 | 3 | 3854.43 | 3853.85 | 108.8 |
|    | HLYSANTVDDFNR                | 72  | 776.69  | 2 | 1551.37 | 1550.71 | 220.3 |
|    | IYFLSTEDLPR                  | 72  | 677.70  | 2 | 1353.39 | 1352.70 | 230.6 |
|    | EGVIYNGLSDWLYEEEEILK         | 71  | 1135.84 | 2 | 2269.66 | 2269.12 | 199.1 |
|    | VAVFGKDYGGYLSTYILPAK         | 71  | 1081.92 | 2 | 2161.83 | 2161.15 | 146.4 |
|    | HLYSANTVDDFNR                | 70  | 776.73  | 2 | 1551.45 | 1550.71 | 170   |
|    | VSALEDOQFLIHATADEK           | 70  | 1064.35 | 2 | 2126.69 | 2127.08 | 187.7 |
|    | IYFLSTEDLPR                  | 69  | 677.79  | 2 | 1353.56 | 1352.70 | 98.8  |
|    | KVTEDLFSDFK                  | 68  | 779.38  | 2 | 1556.74 | 1555.78 | 23.2  |
|    | NKIYFLSTEDLPR                | 68  | 798.82  | 2 | 1595.63 | 1594.84 | 130.1 |
|    | MFDLEANEVQK                  | 66  | 726.90  | 2 | 1451.79 | 1451.66 | 92.7  |
|    | VAVFGKDYGGYLSTYILPAK         | 66  | 1082.08 | 2 | 2162.14 | 2161.15 | 3.9   |
|    | VTEDLFSDFK                   | 66  | 715.09  | 2 | 1428.17 | 1427.68 | 339.4 |
|    | HLYSANTVDDFNR                | 64  | 1551.72 | 1 | 1550.71 | 1550.71 | 0.4   |
|    | MFDLEANEVQK                  | 64  | 727.04  | 2 | 1452.06 | 1451.66 | 272.5 |
|    | IPHGDQPQLDPPEVSNK            | 63  | 950.58  | 2 | 1899.15 | 1899.93 | 112.1 |
|    | KKVTEDLFSDFK                 | 63  | 843.44  | 2 | 1684.86 | 1683.87 | 8.3   |
|    | LYASAFSER                    | 63  | 522.64  | 2 | 1043.27 | 1042.51 | 232.7 |
|    | VTEDLFSDFK                   | 63  | 715.19  | 2 | 1428.37 | 1427.68 | 217.9 |
|    | MFDLEANEVQK                  | 62  | 726.90  | 2 | 1451.78 | 1451.66 | 81    |
|    | KVTEDLFSDFK                  | 61  | 778.93  | 2 | 1555.85 | 1555.78 | 50    |
|    | VSALEDOQFLIHATADEK           | 61  | 1064.56 | 2 | 2127.10 | 2127.08 | 5     |
|    | VTEDLFSDFKIHDPK              | 61  | 740.23  | 3 | 2217.67 | 2218.08 | 182.5 |
|    | IPHGDQPQLDPPEVSNK            | 59  | 951.36  | 2 | 1900.71 | 1899.93 | 114.6 |
|    | IPHGDQPQLDPPEVSNK            | 59  | 951.00  | 2 | 1899.99 | 1899.93 | 32.6  |
|    | VTEDLFSDFKIHDPK              | 59  | 1109.95 | 2 | 2217.88 | 2218.08 | 91    |
|    | NKIYFLSTEDLPR                | 58  | 798.91  | 2 | 1595.80 | 1594.84 | 22.9  |
|    | VTEDLFSDFK                   | 58  | 714.88  | 2 | 1427.74 | 1427.68 | 43.2  |
|    | EGVIYNGLSDWLYEEEEILK         | 57  | 1135.87 | 2 | 2269.72 | 2269.12 | 172.7 |
|    | KGSVILR                      | 56  | 386.93  | 2 | 771.85  | 771.50  | 462.7 |
|    | KVTEDLFSDFK                  | 56  | 779.37  | 2 | 1556.73 | 1555.78 | 27.2  |
|    | VTEDLFSDFK                   | 56  | 714.77  | 2 | 1427.53 | 1427.68 | 107.2 |
|    | KVTEDLFSDFK                  | 55  | 779.26  | 2 | 1556.51 | 1555.78 | 171.1 |
|    | VAVFGKDYGGYLSTYILPAK         | 55  | 1082.06 | 2 | 2162.10 | 2161.15 | 23.3  |
|    | VVSTGKEGVIYNGLSDWLYEEEEILK   | 55  | 947.68  | 3 | 2840.01 | 2840.45 | 153   |
|    | HLYSANTVDDFNR                | 54  | 776.47  | 2 | 1550.92 | 1550.71 | 133.1 |
|    | KKVTEDLFSDFK                 | 54  | 842.96  | 2 | 1683.91 | 1683.87 | 24.8  |
|    | VVSTGKEGVIYNGLSDWLYEEEEILK   | 54  | 947.59  | 3 | 2839.75 | 2840.45 | 107.5 |
|    | KGSVILR                      | 53  | 386.88  | 2 | 771.74  | 771.50  | 311   |
|    | QNEEPVFSKDG                  | 53  | 703.74  | 2 | 1405.46 | 1404.66 | 145.7 |

|                  |    |         |   |         |         |       |
|------------------|----|---------|---|---------|---------|-------|
| ILSYDEKR         | 52 | 512.40  | 2 | 1022.79 | 1022.54 | 246.4 |
| HLYSANTVDDFN     | 51 | 776.66  | 2 | 1551.30 | 1550.71 | 267.9 |
| VTVEDLFSDFKIHDP  | 51 | 1110.53 | 2 | 2219.05 | 2218.08 | 12.5  |
| WISNKEFIYR       | 51 | 678.82  | 2 | 1355.62 | 1354.70 | 58.6  |
| WISNKEFIYR       | 51 | 678.75  | 2 | 1355.49 | 1354.70 | 154   |
| LYASAFSER        | 50 | 522.30  | 2 | 1042.59 | 1042.51 | 79.1  |
| VTVEDLFSDFKIHDP  | 50 | 740.62  | 3 | 2218.85 | 2218.08 | 103.6 |
| ILSYDEKR         | 49 | 512.69  | 2 | 1023.37 | 1022.54 | 164   |
| ILSYDEKR         | 48 | 512.62  | 2 | 1023.23 | 1022.54 | 304.9 |
| IPHGDQSLDPPEV    | 48 | 951.41  | 2 | 1900.81 | 1899.93 | 62.5  |
| IPHGDQSLDPPEV    | 47 | 951.35  | 2 | 1900.68 | 1899.93 | 130.9 |
| QNEEPVFSK        | 47 | 703.66  | 2 | 1405.30 | 1404.66 | 255.9 |
| VSALEDQQFLIHATA  | 47 | 710.31  | 3 | 2127.90 | 2127.08 | 84.5  |
| IPHGDQSLDPPEV    | 46 | 951.29  | 2 | 1900.56 | 1899.93 | 198.3 |
| YGLHGLDNR        | 46 | 579.42  | 2 | 1156.83 | 1156.60 | 201.4 |
| EGVIYNGLSDWLYE   | 45 | 1135.80 | 2 | 2269.59 | 2269.12 | 208.9 |
| IHDPEAK          | 45 | 405.56  | 2 | 809.10  | 808.41  | 381.3 |
| IYFLSTEDLPR      | 45 | 1353.67 | 1 | 1352.66 | 1352.70 | 24.3  |
| HLYSANTVDDFN     | 44 | 776.32  | 2 | 1550.62 | 1550.71 | 59.6  |
| VTVEDLFSDFKIHDP  | 43 | 1110.42 | 2 | 2218.83 | 2218.08 | 112.6 |
| IYFLSTEDLPR      | 42 | 1353.80 | 1 | 1352.79 | 1352.70 | 68.1  |
| TMLKEQYIDKTR     | 42 | 763.75  | 2 | 1525.49 | 1524.80 | 202.7 |
| WISNKEFIYR       | 42 | 678.82  | 2 | 1355.62 | 1354.70 | 61.7  |
| YGLHGLDNR        | 42 | 579.52  | 2 | 1157.02 | 1156.60 | 360.3 |
| ILSYDEKR         | 41 | 512.67  | 2 | 1023.33 | 1022.54 | 202.4 |
| ILSYDEKR         | 41 | 512.58  | 2 | 1023.15 | 1022.54 | 384.1 |
| IPHGDQSLDPPEV    | 41 | 634.34  | 3 | 1900.00 | 1899.93 | 37.9  |
| KKVTVEDLFSDFK    | 40 | 843.26  | 2 | 1684.50 | 1683.87 | 218.1 |
| TMLKEQYIDK       | 40 | 635.31  | 2 | 1268.60 | 1267.65 | 41.2  |
| VSALEDQQFLIHATA  | 40 | 1065.04 | 2 | 2128.07 | 2127.08 | 5.3   |
| HLYSANTVDDFN     | 39 | 1551.82 | 1 | 1550.81 | 1550.71 | 66.6  |
| ILSYDEKR         | 39 | 512.37  | 2 | 1022.72 | 1022.54 | 176   |
| IPHGDQSLDPPEV    | 39 | 951.36  | 2 | 1900.70 | 1899.93 | 123.6 |
| VTVEDLFSDFKIHDP  | 39 | 1110.48 | 2 | 2218.94 | 2218.08 | 63.9  |
| ILSYDEKR         | 38 | 512.70  | 2 | 1023.38 | 1022.54 | 155.4 |
| ILSYDEKR         | 38 | 512.64  | 2 | 1023.27 | 1022.54 | 259.9 |
| IYFLSTEDLPR      | 38 | 677.71  | 2 | 1353.41 | 1352.70 | 213.4 |
| QNEEPVFSK        | 38 | 539.63  | 2 | 1077.25 | 1076.51 | 245.3 |
| QNEEPVFSK        | 38 | 539.55  | 2 | 1077.09 | 1076.51 | 395.8 |
| WISNKEFIYR       | 37 | 452.88  | 3 | 1355.60 | 1354.70 | 73.4  |
| ERKGSVILR        | 36 | 529.33  | 2 | 1056.65 | 1056.64 | 10.8  |
| IHDPEAK          | 36 | 405.34  | 2 | 808.67  | 808.41  | 320   |
| IPHGDQSLDPPEV    | 36 | 634.52  | 3 | 1900.53 | 1899.93 | 213.1 |
| IYFLSTEDLPR      | 36 | 677.56  | 2 | 1353.11 | 1352.70 | 307.5 |
| QNEEPVFSK        | 36 | 1077.59 | 1 | 1076.58 | 1076.51 | 60.2  |
| VSALEDQQFLIHATA  | 36 | 710.04  | 3 | 2127.10 | 2127.08 | 8.9   |
| AYEMTK           | 35 | 742.45  | 1 | 741.44  | 741.34  | 145.7 |
| AYEMTK           | 35 | 742.47  | 1 | 741.46  | 741.34  | 169.9 |
| IHDPEAK          | 35 | 809.53  | 1 | 808.53  | 808.41  | 145.7 |
| EQYIDKTR         | 34 | 526.81  | 2 | 1051.61 | 1051.53 | 74.9  |
| FFFVR            | 34 | 358.45  | 2 | 714.88  | 714.39  | 690.5 |
| VTVEDLFSDFKIHDP  | 34 | 740.62  | 3 | 2218.84 | 2218.08 | 109.8 |
| IPHGDQSLDPPEV    | 33 | 951.33  | 2 | 1900.64 | 1899.93 | 155.1 |
| IPHGDQSLDPPEV    | 33 | 951.26  | 2 | 1900.51 | 1899.93 | 220.4 |
| VAVFGKDYGGVLS    | 33 | 721.50  | 3 | 2161.47 | 2161.15 | 150.2 |
| EQYIDK           | 32 | 795.44  | 1 | 794.43  | 794.38  | 61.3  |
| FFFVR            | 32 | 358.51  | 2 | 715.00  | 714.39  | 537.1 |
| GSVILR           | 32 | 323.04  | 2 | 644.07  | 643.40  | 516   |
| ILSYDEK          | 31 | 867.54  | 1 | 866.53  | 866.44  | 109.8 |
| KGSVILR          | 31 | 772.71  | 1 | 771.70  | 771.50  | 267   |
| WISNK            | 31 | 647.34  | 1 | 646.33  | 646.34  | 20.2  |
| FFFVR            | 30 | 358.33  | 2 | 714.65  | 714.39  | 368.5 |
| FFFVR            | 30 | 358.55  | 2 | 715.08  | 714.39  | 432.1 |
| IHDPEAK          | 30 | 809.47  | 1 | 808.46  | 808.41  | 62.8  |
| KFFFVR           | 30 | 422.40  | 2 | 842.79  | 842.48  | 371.9 |
| QNEEPVFSK        | 30 | 1077.51 | 1 | 1076.50 | 1076.51 | 13    |
| 24 VPVSLHITDNPSR | 95 | 767.72  | 2 | 1533.43 | 1532.83 | 263.8 |
| ILHIDDYELPLQLS   | 90 | 1021.50 | 2 | 2040.99 | 2040.09 | 50.8  |
| VPVSLHITDNPSR    | 88 | 767.81  | 2 | 1533.61 | 1532.83 | 146.9 |
| IGSVEAKDQVA      | 79 | 708.19  | 2 | 1414.36 | 1413.78 | 296.4 |
| ILHIDDYELPLQLS   | 70 | 1021.53 | 2 | 2041.04 | 2040.09 | 26.3  |
| ILHIDDYELPLQLS   | 69 | 1021.35 | 2 | 2040.69 | 2040.09 | 197.8 |
| IYFLSTESSPQGR    | 69 | 742.96  | 2 | 1483.91 | 1483.73 | 120   |

DPP10 91 2097 100% 18 40



|         |     |     |      |   |   |   |                        |    |         |   |         |         |       |
|---------|-----|-----|------|---|---|---|------------------------|----|---------|---|---------|---------|-------|
|         |     |     |      |   |   |   | ILHIDDYELPLQLSFPK      | 68 | 1021.55 | 2 | 2041.09 | 2040.09 | 0.8   |
|         |     |     |      |   |   |   | ILHIDDYELPLQLSFPK      | 65 | 1021.46 | 2 | 2040.90 | 2040.09 | 94.9  |
|         |     |     |      |   |   |   | IYFLSTESSPOGR          | 65 | 743.20  | 2 | 1484.38 | 1483.73 | 235.1 |
|         |     |     |      |   |   |   | LYASAFSER              | 63 | 522.64  | 2 | 1043.27 | 1042.51 | 232.7 |
|         |     |     |      |   |   |   | FHVDWDSVLIDTDNVIVAR    | 62 | 1107.93 | 2 | 2213.84 | 2213.11 | 123   |
|         |     |     |      |   |   |   | QLYSASTEGLLNLR         | 62 | 726.75  | 2 | 1451.49 | 1450.74 | 173.6 |
|         |     |     |      |   |   |   | ILAYDETTQK             | 61 | 591.64  | 2 | 1181.27 | 1180.60 | 274.1 |
|         |     |     |      |   |   |   | ILAYDETTQK             | 59 | 591.37  | 2 | 1180.72 | 1180.60 | 106.8 |
|         |     |     |      |   |   |   | FHVDWDSVLIDTDNVIVAR    | 56 | 1107.89 | 2 | 2213.77 | 2213.11 | 155.5 |
|         |     |     |      |   |   |   | ILHIDDYELPLQLSFPK      | 55 | 1021.41 | 2 | 2040.81 | 2040.09 | 139   |
|         |     |     |      |   |   |   | QNEEPVFSR              | 53 | 553.37  | 2 | 1104.72 | 1104.52 | 178.9 |
|         |     |     |      |   |   |   | YLLKOPYIDSK            | 52 | 684.55  | 2 | 1367.08 | 1366.75 | 241.6 |
|         |     |     |      |   |   |   | FTGALYPK               | 50 | 448.91  | 2 | 895.81  | 895.48  | 373.3 |
|         |     |     |      |   |   |   | LYASAFSER              | 50 | 522.30  | 2 | 1042.59 | 1042.51 | 79.1  |
|         |     |     |      |   |   |   | YFLENNNSVMK            | 49 | 679.57  | 2 | 1357.12 | 1356.67 | 327.3 |
|         |     |     |      |   |   |   | FTGALYPK               | 47 | 449.07  | 2 | 896.13  | 895.48  | 393.8 |
|         |     |     |      |   |   |   | FHVDWDSVLIDTDNVIVAR    | 43 | 1107.83 | 2 | 2213.65 | 2213.11 | 210.6 |
|         |     |     |      |   |   |   | GFGLHNPEPR             | 42 | 562.71  | 2 | 1123.41 | 1122.56 | 126.6 |
|         |     |     |      |   |   |   | YFLENNNSVMK            | 42 | 679.50  | 2 | 1356.98 | 1356.67 | 227.6 |
|         |     |     |      |   |   |   | FTGALYPK               | 41 | 448.84  | 2 | 895.66  | 895.48  | 196.8 |
|         |     |     |      |   |   |   | HSLSPDLK               | 41 | 449.07  | 2 | 896.13  | 895.48  | 387.1 |
|         |     |     |      |   |   |   | QNEEPVFSR              | 41 | 553.66  | 2 | 1105.31 | 1104.52 | 193.1 |
|         |     |     |      |   |   |   | YLLKOPYIDSK            | 40 | 684.54  | 2 | 1367.07 | 1366.75 | 237.2 |
|         |     |     |      |   |   |   | LSLEELLGK              | 37 | 501.62  | 2 | 1001.22 | 1000.58 | 359.5 |
|         |     |     |      |   |   |   | ILHIDDYELPLQLSFPK      | 36 | 681.36  | 3 | 2041.06 | 2040.09 | 14.3  |
|         |     |     |      |   |   |   | QYPYPK                 | 36 | 795.38  | 1 | 794.37  | 794.40  | 28.3  |
|         |     |     |      |   |   |   | LSLEELLGK              | 34 | 501.76  | 2 | 1001.50 | 1000.58 | 78.7  |
|         |     |     |      |   |   |   | QNEEPVFSR              | 33 | 1105.73 | 1 | 1104.72 | 1104.52 | 179.9 |
|         |     |     |      |   |   |   | AKQYPYPK               | 32 | 497.79  | 2 | 993.57  | 993.53  | 45.6  |
|         |     |     |      |   |   |   | HLTSGNWEVIR            | 31 | 656.82  | 2 | 1311.62 | 1310.67 | 40.8  |
|         |     |     |      |   |   |   | HSLSPDLK               | 31 | 448.74  | 2 | 895.46  | 895.48  | 20.8  |
|         |     |     |      |   |   |   | FTGALYPK               | 30 | 449.11  | 2 | 896.20  | 895.48  | 317.9 |
|         |     |     |      |   |   |   | ILAYDETTQK             | 30 | 1181.57 | 1 | 1180.56 | 1180.60 | 32    |
| Kvjβ1   | 45  | 131 | 100% | 2 | 3 | 5 | LYWGKAETER             | 47 | 655.34  | 2 | 1308.66 | 1308.65 | 12.7  |
|         |     |     |      |   |   |   | RSSLVITTK              | 45 | 502.89  | 2 | 1003.77 | 1003.60 | 171.4 |
|         |     |     |      |   |   |   | RSSLVITTK              | 39 | 502.95  | 2 | 1003.89 | 1003.60 | 285   |
| Gabra-6 | 50  | 309 | 100% | 1 | 4 | 3 | ILDNLLEGYDNR           | 97 | 717.85  | 2 | 1433.68 | 1433.72 | 23.2  |
|         |     |     |      |   |   |   | ILDNLLEGYDNR           | 80 | 718.21  | 2 | 1434.41 | 1433.72 | 209.3 |
|         |     |     |      |   |   |   | ILDNLLEGYDNR           | 71 | 718.27  | 2 | 1434.52 | 1433.72 | 132.6 |
|         |     |     |      |   |   |   | ILDNLLEGYDNR           | 61 | 718.19  | 2 | 1434.36 | 1433.72 | 248.5 |
| Gpr158  | 136 | 421 | 100% | 5 | 8 | 5 | EQTVODDLQWYQALVR       | 82 | 996.69  | 2 | 1991.36 | 1990.97 | 195.7 |
|         |     |     |      |   |   |   | EQTVODDLQWYQALVR       | 69 | 996.85  | 2 | 1991.68 | 1990.97 | 146.7 |
|         |     |     |      |   |   |   | VFSVNNFQR              | 56 | 555.98  | 2 | 1109.94 | 1109.56 | 337.1 |
|         |     |     |      |   |   |   | VFSVNNFQR              | 55 | 556.05  | 2 | 1110.08 | 1109.56 | 433.4 |
|         |     |     |      |   |   |   | RITEIPETVSR            | 53 | 651.32  | 2 | 1300.63 | 1299.71 | 64.6  |
|         |     |     |      |   |   |   | TPVLPGR                | 40 | 370.64  | 2 | 739.27  | 738.44  | 234.5 |
|         |     |     |      |   |   |   | LAEEVPVDVASYLYTGDFHQLK | 34 | 832.35  | 3 | 2494.04 | 2493.24 | 80.1  |
|         |     |     |      |   |   |   | TPVLPGR                | 32 | 370.31  | 2 | 738.60  | 738.44  | 221.8 |
| Prkcβ1  | 78  | 312 | 100% | 3 | 7 | 8 | KGTDELYAVK             | 66 | 562.65  | 2 | 1123.28 | 1122.59 | 277.4 |
|         |     |     |      |   |   |   | TFCGTPDYIAPEIIAYQPYGK  | 55 | 1202.55 | 2 | 2403.09 | 2403.15 | 21.7  |
|         |     |     |      |   |   |   | NIDQSEFEGFSFNSEFLKPEVK | 41 | 1346.03 | 2 | 2690.05 | 2689.29 | 89.8  |
|         |     |     |      |   |   |   | NIDQSEFEGFSFNSEFLKPEVK | 40 | 897.74  | 3 | 2690.19 | 2689.29 | 38.8  |
|         |     |     |      |   |   |   | TFCGTPDYIAPEIIAYQPYGK  | 39 | 1202.75 | 2 | 2403.48 | 2403.15 | 138.8 |
|         |     |     |      |   |   |   | TFCGTPDYIAPEIIAYQPYGK  | 36 | 1202.43 | 2 | 2402.85 | 2403.15 | 124.9 |
|         |     |     |      |   |   |   | KGTDELYAVK             | 35 | 562.31  | 2 | 1122.60 | 1122.59 | 6.9   |
